# Supplementary material for: Epidemiological and clinical characteristics analysis of 11 children with 2019 novel coronavirus infection in Chongqing: a single-center retrospective study
Source: PubMed Central journal article supplement — Transl Pediatr. 2020 Dec;9(6):818–26. doi: 10.21037/tp-20-429 (PMC7804472; doi:10.21037/tp-20-429), 2020-12
Supplement: tp-09-06-818-dss.pdf [file tp-09-06-818-dss.pdf]

## Data Sharing Statement

**Article Info** <http://dx.doi.org/10.21037/tp-20-429>

| <b>Item</b> | <b>Question</b>                                                                                                                                     | <b>Authors' Response<br/>(place "-" if not applicable)</b>       |
|-------------|-----------------------------------------------------------------------------------------------------------------------------------------------------|------------------------------------------------------------------|
| 1           | Would you like to share data collected for your study to others?                                                                                    | No.                                                              |
| 2           | If not, would you like to share the reason for your decision?                                                                                       | Not in accordance with the relevant regulations of our hospital. |
| 3           | What data in particular will be shared?                                                                                                             | -                                                                |
| 4           | Any other documents will be shared? Such as study protocol, statistical analysis plan, informed consent form, clinical study report, analytic code. | No.                                                              |
| 5           | When will data availability begin?                                                                                                                  | -                                                                |
| 6           | When will data availability end?                                                                                                                    | -                                                                |
| 7           | To whom will you share the data?                                                                                                                    | -                                                                |
| 8           | For what type of analysis or purpose?                                                                                                               | -                                                                |
| 9           | How or where can the data/documents be obtained?                                                                                                    | -                                                                |
| 10          | Any other restrictions?                                                                                                                             | -                                                                |
